# Supplementary material for: Supersonically Sprayed Flexible ZnO/PVDF Composite Films with Enhanced Piezoelectricity for Energy Harvesting and Storage
Source: Hindawi journal article supplement (doi:10.1155/2023/3074782), 2023-07-13
Supplement: f1 [file 3074782.f1.docx]

**Supporting Information**

**Supersonically sprayed flexible ZnO/PVDF composite films with enhanced piezoelectricity for energy harvesting and storage**

**Devi Prashad Ojhaa,b,†, Bhavana Joshic,†, Edmund Samueld,†, Ashwin Khadkac, Ali Aldalbahie, Govindasami Periyasamie, Daekyu Choia,b, Seongpil Ana,b,f*, Sam S. Yoonc,***

aSKKU Advanced Institute of Nanotechnology (SAINT), Sungkyunkwan University (SKKU), Suwon 16419, Republic of Korea

bDepartment of Nano Science and Technology, Sungkyunkwan University (SKKU), Suwon 16419, Republic of Korea

cSchool of Mechanical Engineering, Korea University, Seoul 02841, Republic of Korea

dEnergy Environment Policy and Technology, Graduate School of Energy and Environment (KU-KIST Green School), Korea University, Seoul 02841, Republic of Korea

eDepartment of Chemistry, College of Science, King Saud University, Riyadh 11451, Saudi Arabia

fDepartment of Nano Engineering, Sungkyunkwan University (SKKU), Suwon 16419, Republic of Korea

**Keywords:**Zinc oxide (ZnO), polyvinylidene fluoride (PVDF), supersonic spraying, flexible piezoelectric nanogenerator (PENG), supercapacitor

***Corresponding authors:** [esan@skku.edu](mailto:esan@skku.edu) (S. An), [skyoon@korea.ac.kr](mailto:skyoon@korea.ac.kr) (S.S. Yoon)

**†**These authors have equally contributed.

***S1. Calculation of the tip deflection (D) of PVDF-based and ZP5-based composite films with regard to PFM amplitude***

The magnitude of the tip deflection, i.e., *D*, was calculated using the following equation:

(S1)

where A and B denote the initial and final points of the cantilever tip, and *A*m denotes the measured PFM amplitude value (mV). *S*, defines the vertical sensitivity of the PFM tip, and the calibrated value is 33 × 106 V/m. *Ag* denotes the lock-in amplitude gain, which is equal to 1. The (A+B) DC gain correction factor is 3.4. The ratio of “(A-B) DC gain,” to “(A-B) AC gain” is 1.

***S2. Calculations of capacitance, power density, and energy density***

The areal capacitance *C* (F cm-2) of the electrode was calculated based on the GCD data using the following equation [1]:

, (S2)

where *I* denotes the current (A), Δ*t* denotes the discharge time (s) (as illustrated in the GCD curve), *A* denotes the total electrode area (cm2), and Δ*V* denotes the potential window (V).

The areal energy density *E* (Wh cm-2) and power density *P* (W cm-2) were calculated using the following equations [1]:

. (S3)

. (S4)


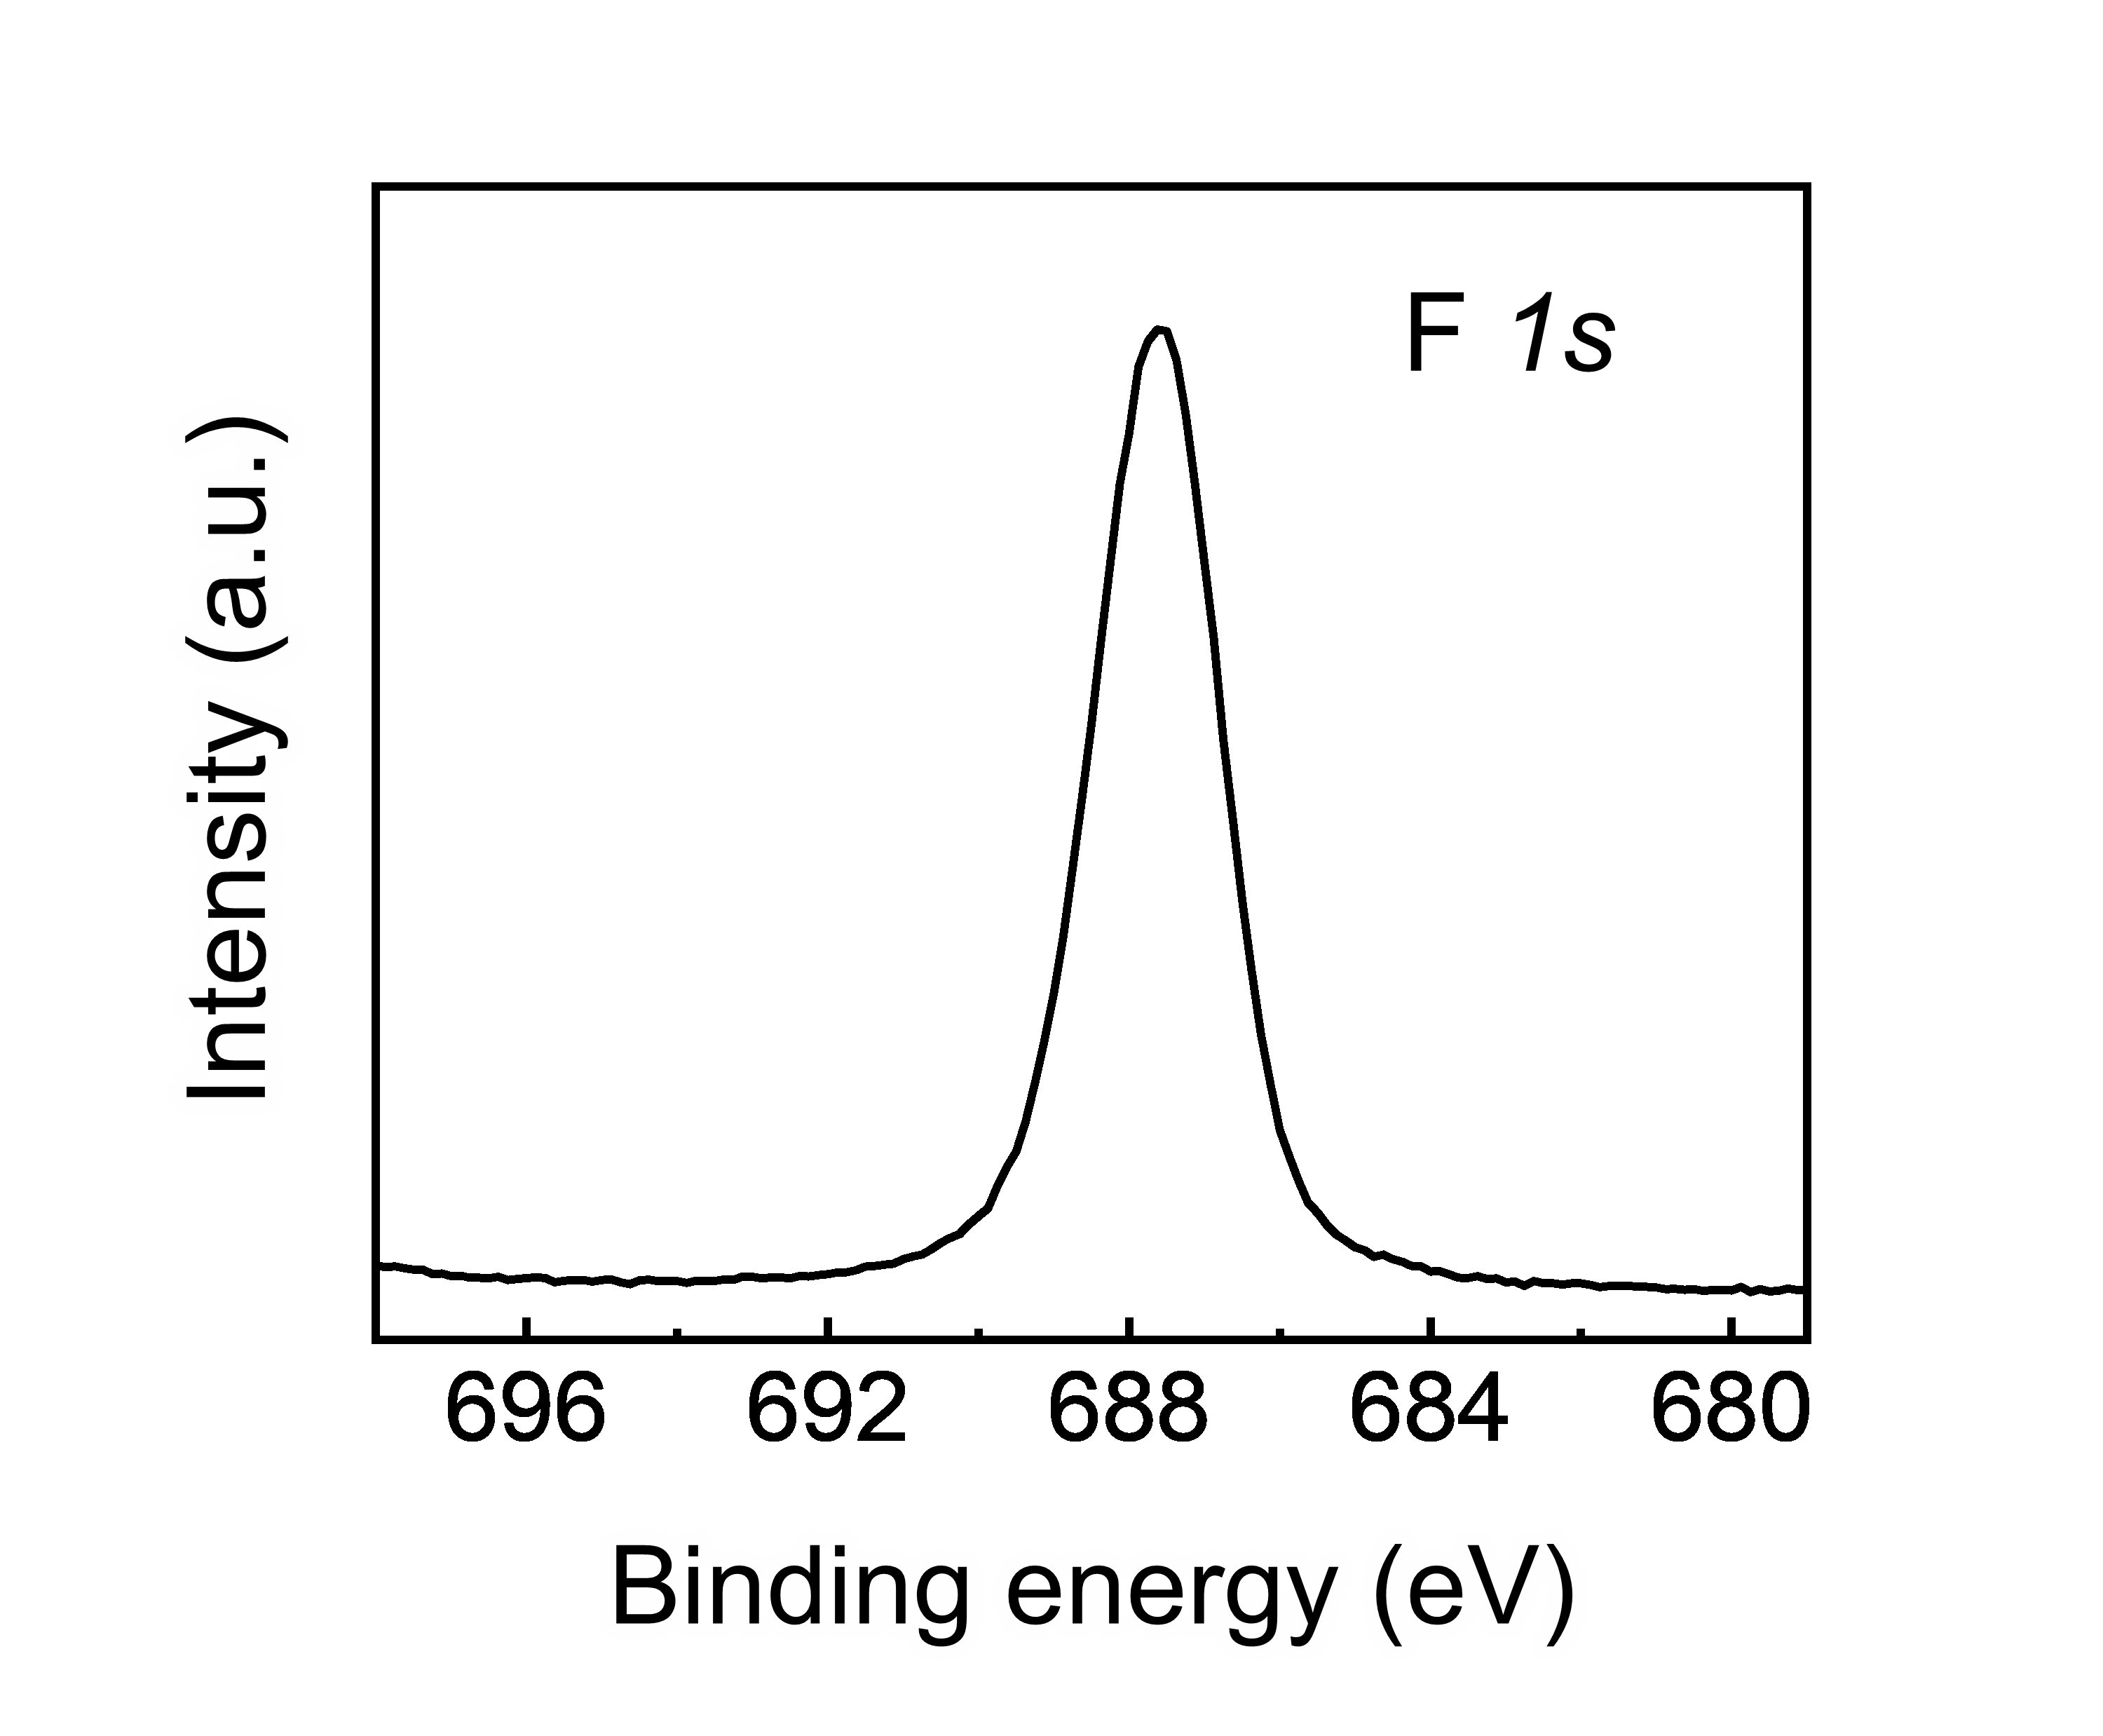


**Figure S1.** XPS core-level spectrum of F 1s of the ZP5 composite film.

**References**

1. Park C, Samuel E, Kim B-Y, An S, Lee H-S, Yoon SS. Supersonically sprayed self-aligned rGO nanosheets and ZnO/ZnMn2O4 nanowires for high-energy and high-power-density supercapacitors. J Mater Sci Technol. 2023;137:193-204.
